# Supplementary material
Source: publisher figshare collection journal article supplement (https://sage.figshare.com/ndownloader/files/12404579)
Supplement: Supplementary file 1 [file 12404579]

**Supplemental Table 1. Correlates of ABI in healthy NHANES subjects > 40 years**

|                                                 | <b>Model 1</b><br><i>Coefficient</i> | <b>Model 2</b><br><i>Coefficient</i> | <b>Model 3</b><br><i>Coefficient</i> |
|-------------------------------------------------|--------------------------------------|--------------------------------------|--------------------------------------|
| <b>Height (per cm)</b>                          | *0.002                               | *0.002                               | *0.002                               |
| <b>Female</b>                                   | -                                    | -0.012                               | *-0.034                              |
| <b>Age (per 10 years)</b>                       | -                                    | -                                    | *-0.014                              |
| <b>Race</b>                                     |                                      |                                      |                                      |
| Non-Hispanic White                              | Ref                                  | Ref                                  | Ref                                  |
| Black                                           | -                                    | -                                    | *-0.083                              |
| Mexican American                                | -                                    | -                                    | *-0.030                              |
| Other                                           | -                                    | -                                    | -0.007                               |
| Other Hispanic                                  | -                                    | -                                    | 0.0005                               |
| <b>Ever smoker (&gt;100 cigarettes in life)</b> | -                                    | -                                    | -0.016                               |
| <b>Non-HDL (per mg/dL)</b>                      | -                                    | -                                    | -0.0002                              |

Model 1: height, Model 2: height, sex, Model 3: height, age, sex, ethnicity, ever smoker, non-HDL. \*p<0.05  
 ABI = ankle-brachial index; NHANES = National Health and Nutrition Examination Survey; non-HDL = non-high-density lipoprotein cholesterol.
